# Supplementary material for: Mapping the discursive dimensions of the reproducibility crisis: A mixed methods analysis
Source: PubMed Central journal article supplement (PMC8270481; doi:10.1371/journal.pone.0254090), 2021-07-09
Supplement: pone.0254090.s002.pdf [file pone.0254090.s002.pdf]

S1 Table. Inter-rater reliability Kappa scores for all themes coded.

| Theme                                                    | Pairwise Kappa |       |        | Average Kappa |
|----------------------------------------------------------|----------------|-------|--------|---------------|
|                                                          | JC–NCN         | KI–JC | KI–NCN |               |
| 2016 Nature survey                                       | 0.98           | 0.92  | 0.94   | 0.95          |
| Loss of funding                                          | 1.00           | 0.87  | 0.87   | 0.91          |
| John Ioannidis                                           | 0.85           | 0.78  | 0.83   | 0.82          |
| Methods training                                         | 0.75           | 0.81  | 0.84   | 0.80          |
| Brian Nosek/Center for Open Science                      | 0.80           | 0.80  | 0.77   | 0.79          |
| Transparency                                             | 0.82           | 0.73  | 0.75   | 0.77          |
| Amgen or Bayer studies                                   | 0.80           | 0.68  | 0.80   | 0.76          |
| Pre-registration                                         | 0.71           | 0.76  | 0.79   | 0.75          |
| Retractions                                              | 0.76           | 0.78  | 0.60   | 0.71          |
| Popular press coverage                                   | 0.66           | 0.67  | 0.76   | 0.70          |
| Impact on policy or habits                               | 0.72           | 0.62  | 0.75   | 0.70          |
| Government/NGO actions                                   | 0.78           | 0.57  | 0.74   | 0.70          |
| Andrew Gelman                                            | 0.90           | 0.63  | 0.56   | 0.70          |
| Sample size and power                                    | 0.71           | 0.65  | 0.70   | 0.69          |
| Peer review                                              | 0.63           | 0.60  | 0.82   | 0.68          |
| Reagents                                                 | 0.81           | 0.52  | 0.68   | 0.67          |
| Economic cost                                            | 0.76           | 0.63  | 0.60   | 0.66          |
| Failure to replicate important findings                  | 0.67           | 0.70  | 0.59   | 0.65          |
| General public expectations                              | 0.69           | 0.70  | 0.56   | 0.65          |
| Incentives                                               | 0.65           | 0.61  | 0.68   | 0.65          |
| P values                                                 | 0.67           | 0.61  | 0.64   | 0.64          |
| Career costs to scientists                               | 0.59           | 0.68  | 0.64   | 0.64          |
| Heterogeneity                                            | 0.52           | 0.67  | 0.71   | 0.63          |
| Bayesian statistics                                      | 0.79           | 0.59  | 0.52   | 0.63          |
| Meta-science                                             | 0.79           | 0.54  | 0.55   | 0.63          |
| Field differences                                        | 0.65           | 0.61  | 0.60   | 0.62          |
| Fraud                                                    | 0.51           | 0.59  | 0.72   | 0.61          |
| Publishing culture                                       | 0.69           | 0.60  | 0.53   | 0.61          |
| Legitimacy of science                                    | 0.53           | 0.68  | 0.59   | 0.60          |
| <i>excluded from analysis (average Kappa &lt; 0.60):</i> |                |       |        |               |
| Problems with the solutions                              | 0.59           | 0.61  | 0.57   | 0.59          |
| Epistemology                                             | 0.62           | 0.61  | 0.52   | 0.58          |
| Replication                                              | 0.51           | 0.60  | 0.55   | 0.55          |

*Continued on next page*

| Theme                           | Pairwise Kappa |       |        | Average Kappa |
|---------------------------------|----------------|-------|--------|---------------|
|                                 | JC–NCN         | KI–JC | KI–NCN |               |
| Impact on medicine              | 0.67           | 0.51  | 0.48   | 0.55          |
| Communication and collaboration | 0.44           | 0.58  | 0.63   | 0.55          |
| Implausible findings            | 0.65           | 0.36  | 0.62   | 0.54          |
| Effect size                     | 0.63           | 0.43  | 0.56   | 0.54          |
| Fraud is a problem              | 0.41           | 0.53  | 0.65   | 0.53          |
| Selective reporting             | 0.51           | 0.53  | 0.50   | 0.51          |
| Failures to replicate           | 0.53           | 0.51  | 0.50   | 0.51          |
| Experimental design             | 0.56           | 0.52  | 0.45   | 0.51          |
| Personal anecdotes              | 0.59           | 0.50  | 0.39   | 0.49          |
| Fraud is not a problem          | 0.30           | 0.46  | 0.65   | 0.47          |
| Other statistical discussion    | 0.41           | 0.40  | 0.54   | 0.45          |
| Other quantifying studies       | 0.51           | 0.35  | 0.49   | 0.45          |
| Data collection and analysis    | 0.42           | 0.47  | 0.45   | 0.45          |
| Attention in scientific venues  | 0.47           | 0.44  | 0.37   | 0.43          |
| Bias                            | 0.49           | 0.40  | 0.38   | 0.42          |
| Evidence synthesis              | 0.49           | 0.28  | 0.49   | 0.42          |
| Sloppy research practices       | 0.53           | 0.34  | 0.38   | 0.42          |
| Progress of science             | 0.37           | 0.38  | 0.35   | 0.37          |
| Regulation                      | 0.33           | 0.42  | 0.34   | 0.36          |
| Other failures to replicate     | 0.21           | 0.43  | 0.19   | 0.28          |
| Scientists' expectations        | 0.30           | 0.30  | 0.23   | 0.28          |
