# Supplementary material for: Mapping the discursive dimensions of the reproducibility crisis: A mixed methods analysis
Source: PubMed Central journal article supplement (PMC8270481; doi:10.1371/journal.pone.0254090), 2021-07-09
Supplement: pone.0254090.s003.pdf [file pone.0254090.s003.pdf]

S2 Table. Percentage share of the mean article profile, coordinates, contribution, and  $\cos^2$  for all themes included in the correspondence analysis.

| Theme                                   | % mean article | Dim. 1 | Dim. 2 | Contribution | $\cos^2$ |
|-----------------------------------------|----------------|--------|--------|--------------|----------|
| Transparency                            | 9.25           | -0.31  | -0.09  | 2.12         | 0.06     |
| Incentives                              | 8.34           | -0.18  | -0.15  | 0.95         | 0.03     |
| Heterogeneity                           | 7.12           | 0.25   | 0.72   | 7.65         | 0.09     |
| Field differences                       | 6.28           | 0.31   | -0.07  | 1.25         | 0.03     |
| Brian Nosek/Center for Open Science     | 6.21           | 0.32   | -0.12  | 1.64         | 0.03     |
| P values                                | 6.01           | 1.30   | 1.01   | 33.91        | 0.55     |
| Publishing culture                      | 5.82           | -0.22  | -0.22  | 1.34         | 0.06     |
| Sample size and power                   | 4.18           | 0.61   | 0.53   | 4.65         | 0.15     |
| Fraud                                   | 4.14           | -0.03  | -0.51  | 2.46         | 0.06     |
| Peer review                             | 3.46           | -0.18  | -0.57  | 3.92         | 0.10     |
| John Ioannidis                          | 3.19           | 0.36   | 0.07   | 0.88         | 0.03     |
| Legitimacy of science                   | 3.15           | -0.05  | -0.77  | 4.21         | 0.12     |
| Career costs to scientists              | 3.10           | 0.04   | -0.42  | 1.36         | 0.03     |
| Government/NGO actions                  | 2.99           | -0.90  | 0.28   | 6.00         | 0.13     |
| Reagents                                | 2.66           | -2.66  | 2.18   | 74.06        | 0.84     |
| Impact on policy or habits              | 2.62           | -0.02  | -0.92  | 6.65         | 0.14     |
| General public expectations             | 2.52           | 0.03   | -0.69  | 2.89         | 0.06     |
| Amgen or Bayer studies                  | 2.47           | -0.56  | 0.22   | 1.82         | 0.05     |
| Methods training                        | 2.46           | -0.25  | -0.14  | 0.48         | 0.01     |
| Failure to replicate important findings | 2.44           | 0.31   | -0.52  | 1.84         | 0.05     |
| Economic cost                           | 1.83           | -0.60  | 0.25   | 1.56         | 0.06     |
| Pre-registration                        | 1.65           | 0.22   | -0.12  | 0.22         | 0.01     |
| Retractions                             | 1.64           | -0.11  | -0.90  | 3.12         | 0.06     |
| Bayesian statistics                     | 1.61           | 2.58   | 2.43   | 30.91        | 0.48     |
| Popular press coverage                  | 1.54           | 0.18   | -0.46  | 0.78         | 0.03     |
| Meta-science                            | 1.34           | 0.02   | -0.54  | 0.77         | 0.02     |
| 2016 Nature survey                      | 0.83           | -0.22  | -0.31  | 0.21         | 0.01     |
| Andrew Gelman                           | 0.57           | 1.20   | 0.58   | 2.00         | 0.10     |
| Loss of funding                         | 0.54           | -0.26  | -0.50  | 0.34         | 0.01     |
